# Supplementary material for: Telomere length is not a main factor for the development of islet autoimmunity and type 1 diabetes in the TEDDY study
Source: Springer Nature journal article supplement (doi:10.1038/s41598-022-08058-7), 2022-03-16
Supplement: MOESM1 [file 41598_2022_8058_MOESM1_ESM.pdf › 41598_2022_8058_MOESM1_ESM.pdf]

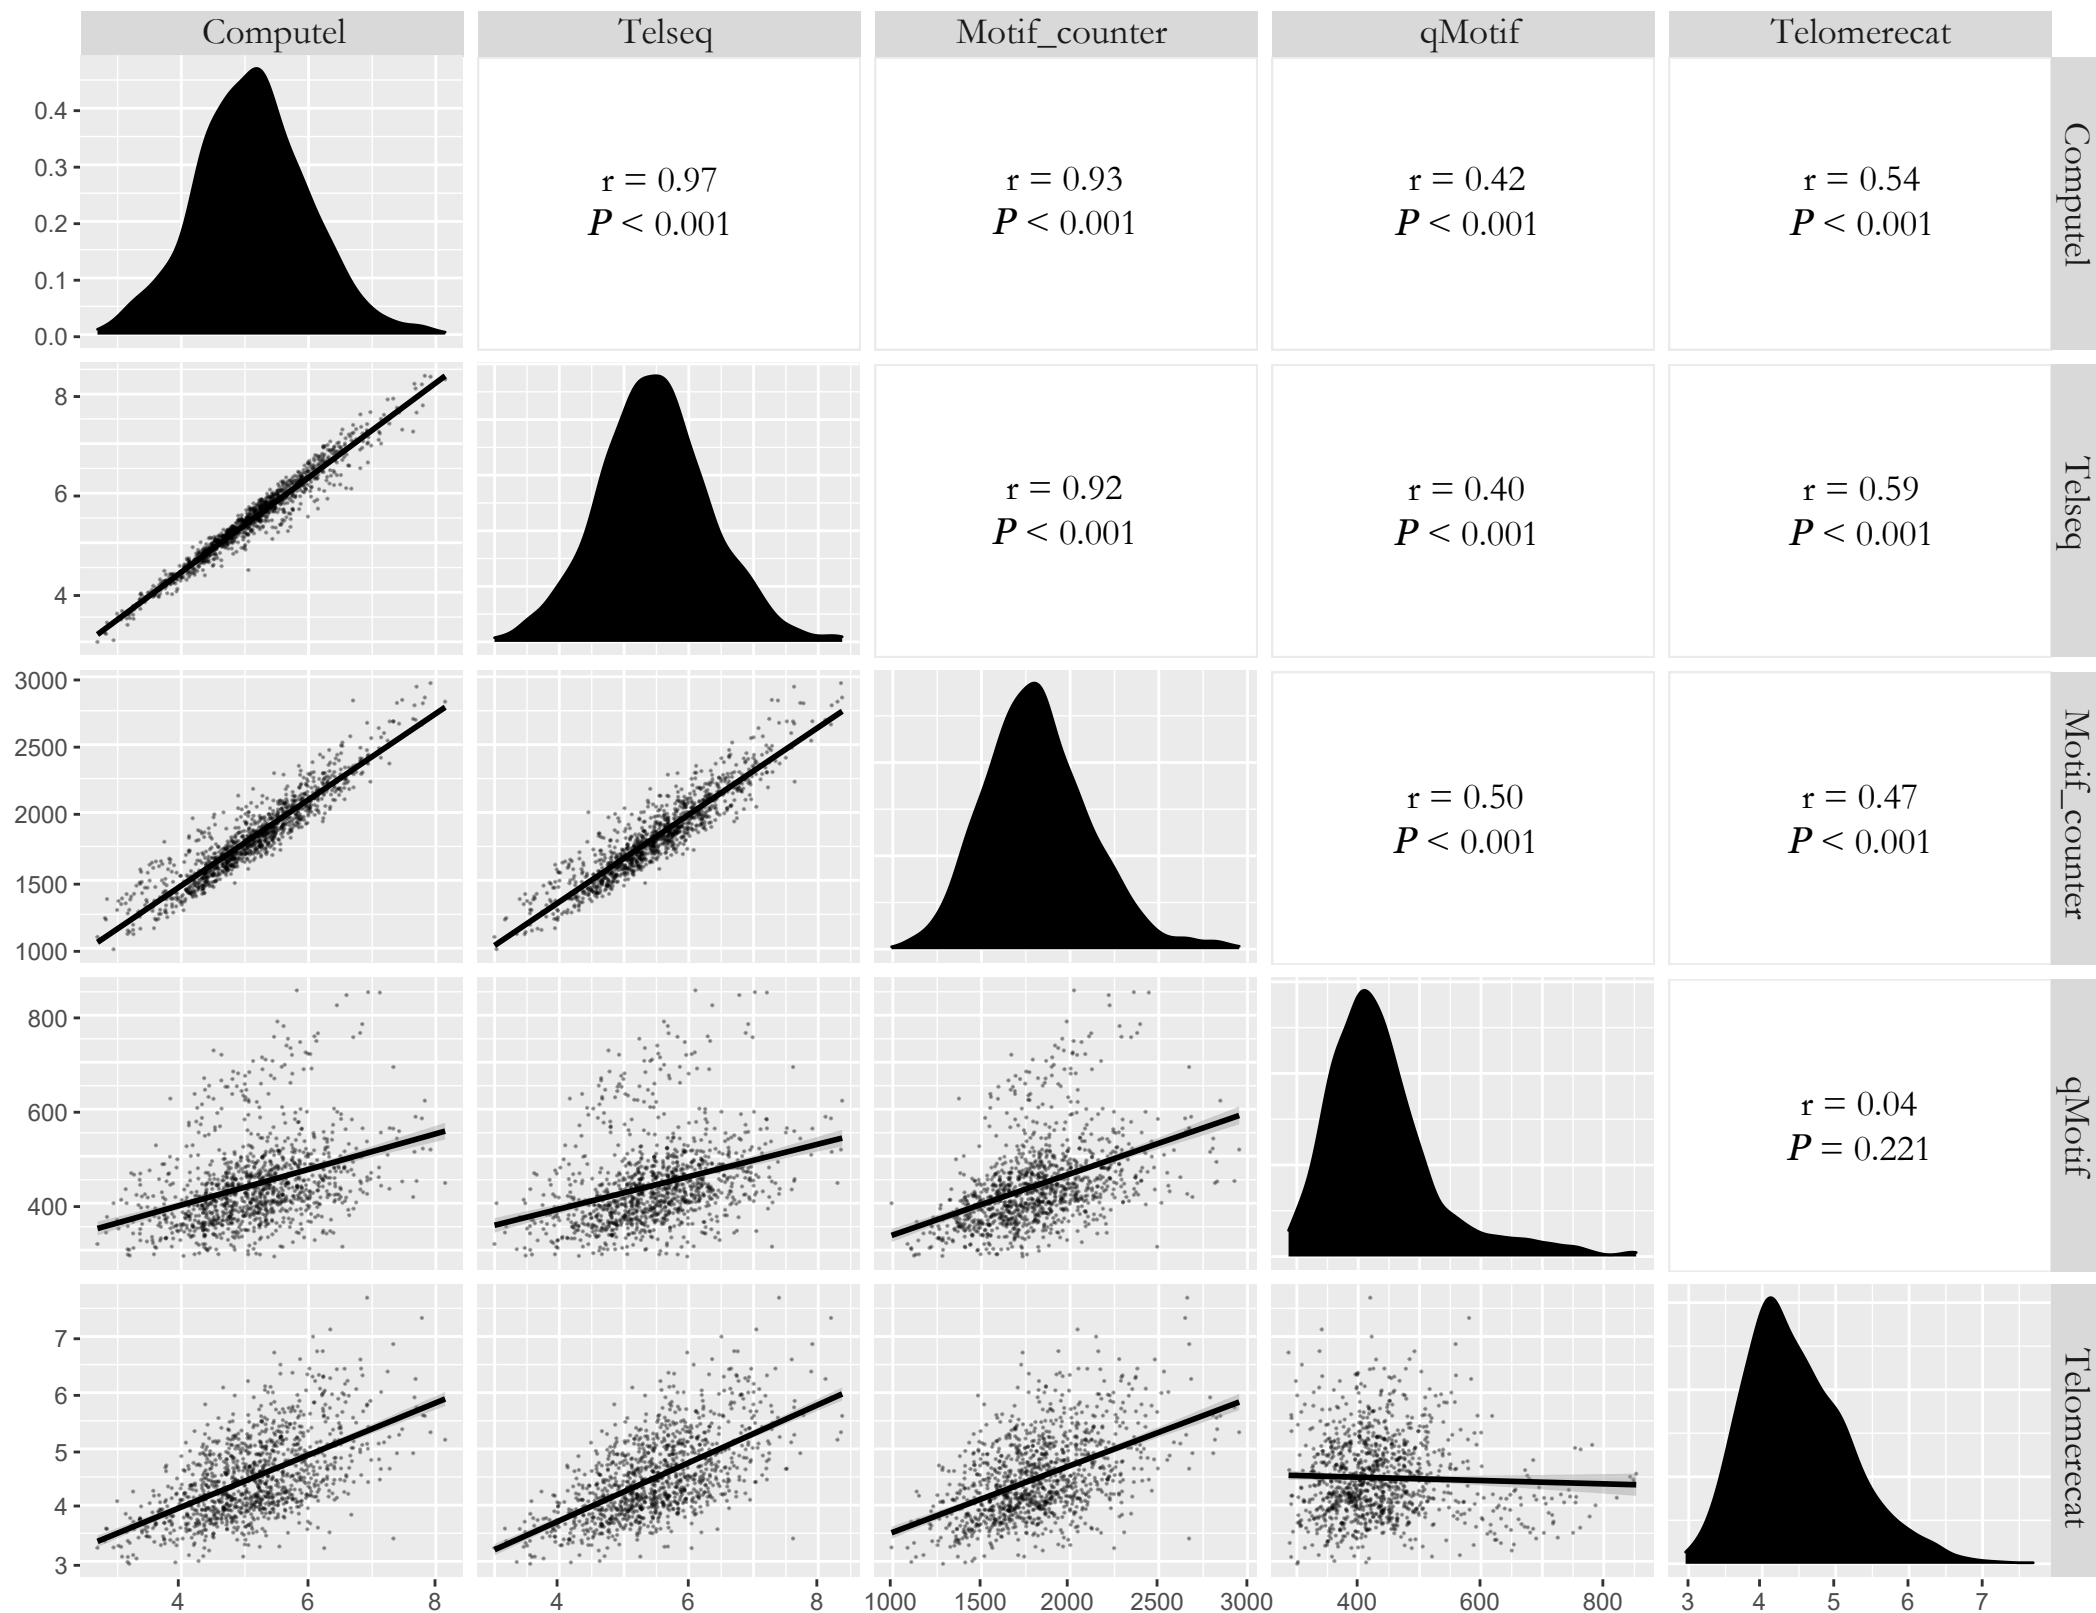

**Supplementary Figure 1:** Illustration of the correlation between five different tools to estimate telomere length from the whole-genome sequence data. The tools were as follows: (1) Computel (in kb) (2) Telseq (in kb) (2) Motif\_counter (telomere reads per 1x genome coverage) (3) qMotif (telomere reads per 1x genome coverage) (4) Telomerecat (in kb).
